# Supplementary material for: Development of a Novel LC-MS/MS Multi-Method for the Determination of Regulated and Emerging Food Contaminants Including Tenuazonic Acid, a Chromatographically Challenging Alternaria Toxin
Source: MDPI journal article supplement (doi:10.3390/molecules28031468), 2023-02-02
Supplement: s1 [file s1]

Article

# Development of a novel LC-MS/MS multi-method for the determination of regulated and emerging food contaminants including tenuazonic acid, a chromatographically challenging *Alternaria* toxin

Ádám Tölgyesi<sup>1,\*</sup>, Attila Cseh<sup>1</sup>, Andrea Simon<sup>1</sup> and Virender K. Sharma<sup>2,\*</sup>

<sup>1</sup> Mertcontrol Hungary Ltd, Szabadság út 13., 2144 Kerepes, Hungary

<sup>2</sup> Program for the Environment and Sustainability, Department of Environmental and Occupational Health, School of Public Health, Texas A&M University, 212 Adriance Lab Road, 1266 TAMU, College Station, TX 77843, USA

\* Correspondence: atolgyesi@mertcontrol.com; (Á.T.); vsharma@tamu.edu; VKS



Table S1: Quality control and proficiency test materials.

| QC name  | Code  | Origin                 | Matrix | Compound group   | Compounds with assigned value $\pm$ standard deviation, expressed in $\mu\text{g/kg}$                                                                                                                                                                                                                                                                        |
|----------|-------|------------------------|--------|------------------|--------------------------------------------------------------------------------------------------------------------------------------------------------------------------------------------------------------------------------------------------------------------------------------------------------------------------------------------------------------|
| EURL2017 | EA047 | JRC (Geel, Belgium)    | Rye    | Ergot alkaloid   | Ergocornine/inine SUM $295\pm65$ ;<br>$\alpha$ -Ergocryptine/inine SUM $231\pm51$ ;<br>Ergocrystine/inine SUM $752\pm165$ ;<br>Ergometrine/inine SUM $116\pm26$ ;<br>Ergosine/inine SUM $242\pm53$ ;<br>Ergotamine/inine SUM $695\pm153$                                                                                                                     |
| FAPAS    | 22180 | Fera (Sand Hutton, UK) | Rye    | Ergot alkaloid   | Ergocornine $32.4\pm7.2$ ;<br>Ergocorninine $12.4\pm2.7$ ;<br>$\alpha$ -Ergocryptinine $19.5\pm4.3$ ;<br>Ergocrystine $107\pm23$ ;<br>Ergocrystinine $36.4\pm8$ ;<br>Ergometrin $25.9\pm5.7$ ;<br>Ergometrinine $4.2\pm0.95$ ;<br>Ergosine $22.2\pm4.9$ ;<br>Ergotamin $50.2\pm11.1$ ;<br>Ergotaminine $13.6\pm2.9$ ;<br>Total Ergot Alkaloides $419\pm76$ ; |
| EURL2017 | A004  | JRC (Geel, Belgium)    | Wheat  | DON              | DON $551\pm121$                                                                                                                                                                                                                                                                                                                                              |
| EURL2016 | C257  | JRC (Geel, Belgium)    | Maize  | Mycotoxin        | DON $611\pm134$<br>AFB1 $10.6\pm2.3$<br>FUMB1 $768\pm170$<br>FUMB2 $224\pm49$<br>ZON $162\pm36$                                                                                                                                                                                                                                                              |
| EURL2016 | O161  | JRC (Geel, Belgium)    | Oat    | Mycotoxin        | HT2 $150\pm33$<br>T2 $70.3\pm16$                                                                                                                                                                                                                                                                                                                             |
| EURL2016 | E087  | JRC (Geel, Belgium)    | Cereal | Tropan alkaloids | Atropine $7.44\pm1.52$ ;<br>Scopolamine $1.03\pm0.22$ ;                                                                                                                                                                                                                                                                                                      |
| EURL2016 | C029  | JRC (Geel, Belgium)    | Cereal | Tropan alkaloids | Atropine $1.16\pm0.25$ ;<br>Scopolamine $0.183\pm0.081$ ;                                                                                                                                                                                                                                                                                                    |
| Fapas    | 22179 | Fera (Sand Hutton, UK) | Cereal | Tropan alkaloids | Atropine $9.8\pm2.16$ ;<br>Scopolamine $3.88\pm0.85$ ;                                                                                                                                                                                                                                                                                                       |



|          |               |                                |                 |                 |                                                                                                                                                                                                                             |
|----------|---------------|--------------------------------|-----------------|-----------------|-----------------------------------------------------------------------------------------------------------------------------------------------------------------------------------------------------------------------------|
| QC 2018  | B56           | JRC (Geel, Belgium)            | Wheat           | Alternaria      | AME 1.17±0.25;<br>AOH 2.1±0.46;<br>TEA 297±60;                                                                                                                                                                              |
| QC 2018  | T15           | JRC (Geel, Belgium)            | Wheat           | Alternaria      | AME 5.06±1.11;<br>AOH 5.11±1.12;<br>TEA 52±11;                                                                                                                                                                              |
| QC 2018  | X06           | JRC (Geel, Belgium)            | Sunflower seeds | Alternaria      | AME 2.1±0.45;<br>AOH 2.06±0.44;<br>TEA 146±32;                                                                                                                                                                              |
| Romer QC | 10006460      | RomerLabs (Tulln, Austria)     | Wheat           | Don, Zon, Ochra | DON 825±124;<br>ZON 34.9±5.95;<br>OTA 10±2.1;                                                                                                                                                                               |
| Romer QC | 10003613      | RomerLabs (Tulln, Austria)     | Maize           | Aflatoxins      | AFB1 9.5±2.1;<br>AFB2 2.1±0.4;                                                                                                                                                                                              |
| Trilogy  | TQC-MMF11-100 | R-Biopharm (Budapest, Hungary) | Maize           | Multi-Toxin     | DON 1900±200<br>AFB1 18.6±4.1<br>AFB2 1.3±0.28<br>Total Aflatoxins 19.9±4.4<br>FUMB1 1400±150<br>FUMB2 400±35<br>FUMB3 100±15<br>Total Fumonisin 1900±200<br>HT2 127±12.3<br>T2 94.8±7.95<br>OTA 18.5±3.1<br>ZON 359.7±40.1 |
| Gafta PT | 2022-M2       | Gafta (London, UK)             | Maize           | Aflatoxins      | AFB1 1.60±0.35<br>AFB2 0.50±0.11<br>AFG1 1.50±0.33<br>AFG2 0.5±0.11<br>Total Aflatoxins 3.73±0.82                                                                                                                           |
| Gafta PT | 2022-M1       | Gafta (London, UK)             | Wheat           | T2, HT2         | HT2 7.3±3.2<br>T2 43.8±19.3                                                                                                                                                                                                 |
| Romer PT | M21161DZO     | RomerLabs (Tulln, Austria)     | Wheat           | Don, Zon, Ochra | DON 2841±255;<br>OTA 30.7±7.75;<br>ZON 177±38.9;                                                                                                                                                                            |



|                               |           |                                                       |                 |                           |                                                                                                                                                                                                                                          |
|-------------------------------|-----------|-------------------------------------------------------|-----------------|---------------------------|------------------------------------------------------------------------------------------------------------------------------------------------------------------------------------------------------------------------------------------|
| Romer PT                      | M22411AF  | RomerLabs<br>(Tulln,<br>Austria)                      | Maize           | Aflatoxins,<br>fumonisins | AFB1 8.79±1.93<br>AFB2 0.63±0.14<br>AFG1 0.49±0.11<br>Total Aflatoxins 9.72±2.14<br>FUMB1 1425±185<br>FUMB2 387±75<br>FUMB3 168±35.5<br>Total Fumonisin 1911±230                                                                         |
| Romer PT                      | M22161DZO | RomerLabs<br>(Tulln,<br>Austria)                      | Wheat           | Don, Zon, Ochra           | DON 1826±264;<br>OTA 25.9±5.6;<br>ZON 545±86.5;                                                                                                                                                                                          |
| FAPAS                         | T09133QC  | Fera (Sand<br>Hutton, UK)                             | Kidney<br>beans | Pesticides                | Boscalid 107±23;<br>Chlorpyrifos-ethyl 103±23;<br>Flufenoxuron 55±12;<br>Flusilazole 155±32<br>Isofenphos-methyl 77±17;<br>Isoprothiolane 156±33;<br>Methacrifos 119±27;<br>Pirimicarb 101±22;<br>Pyridaben 53±12;<br>Thiacloprid 85±18; |
| FAPAS                         | T09140QC  | Fera (Sand<br>Hutton, UK)                             | Wheat<br>flour  | Pesticides                | Chlorpropham 58.9±13<br>Dicotophos 33.2±7.3<br>Dimetoate 32.1±7.1<br>Oxadiazon 77.8±17.1<br>Paclobutrazole 98.3±21.6<br>Permethrin 64.7±14.3<br>Pirimiphos-methyl<br>104±23<br>Prochloraz 153±32.5<br>Tebuconazole 87.3±19.2             |
| PT,<br>Chlorpyrifos-<br>ethyl | 6         | Bálint<br>Analitika<br>Ltd.<br>(Budapest,<br>Hungary) | Wheat           | Chlorpyrifos-<br>ethyl    | Chlorpyrifos-ethyl 33.0±7.26                                                                                                                                                                                                             |
| PT,<br>Chlorpyrifos-<br>ethyl | 8         | Mertcontrol-<br>HL Ltd.<br>(Debrecen,<br>Hungary)     | Wheat           | Chlorpyrifos-<br>ethyl    | Chlorpyrifos-ethyl 16.9±3.72                                                                                                                                                                                                             |



Table S2: The scheduled MRM ion transitions of the tested compounds.

| Compound Name              | Precursor Ion (m/z) | Product Ion (m/z) | Retention Time (min) | Fragmentor (V) | Collision Energy (V) | Polarity |
|----------------------------|---------------------|-------------------|----------------------|----------------|----------------------|----------|
| Acephate                   | 183.9               | 143               | 2.8                  | 65             | 2                    | Positive |
| Acephate                   | 183.9               | 125               | 2.8                  | 65             | 17                   | Positive |
| Acetamiprid                | 223                 | 126               | 6.4                  | 83             | 22                   | Positive |
| Acetamiprid                | 223                 | 90                | 6.4                  | 83             | 35                   | Positive |
| Afla B1                    | 313                 | 285               | 8.2                  | 155            | 22                   | Positive |
| Afla B1                    | 313                 | 241               | 8.2                  | 155            | 38                   | Positive |
| Afla B1- <sup>13</sup> C17 | 330                 | 301               | 8.2                  | 155            | 21                   | Positive |
| Afla B2                    | 315                 | 287               | 7.8                  | 155            | 24                   | Positive |
| Afla B2                    | 315                 | 259               | 7.8                  | 155            | 28                   | Positive |
| Afla B2- <sup>13</sup> C17 | 332                 | 303               | 7.8                  | 155            | 21                   | Positive |
| Afla G1                    | 329                 | 311               | 7.5                  | 140            | 22                   | Positive |
| Afla G1                    | 329                 | 243               | 7.5                  | 140            | 24                   | Positive |
| Afla G1- <sup>13</sup> C17 | 346                 | 257               | 7.5                  | 140            | 24                   | Positive |
| Afla G2                    | 331                 | 313               | 7.1                  | 155            | 23                   | Positive |
| Afla G2                    | 331                 | 245               | 7.1                  | 155            | 28                   | Positive |
| Afla G2- <sup>13</sup> C17 | 348                 | 330               | 7.1                  | 155            | 23                   | Positive |
| Alanycarb                  | 400                 | 238               | 12.8                 | 140            | 4                    | Positive |
| Alanycarb                  | 400                 | 91                | 12.8                 | 140            | 50                   | Positive |
| Aldicarb                   | 208                 | 116               | 7.4                  | 65             | 0                    | Positive |
| Aldicarb                   | 208                 | 89                | 7.4                  | 65             | 12                   | Positive |
| Aldicarb fragment          | 116                 | 89                | 7.4                  | 65             | 4                    | Positive |
| Aldicarb fragment          | 116                 | 70                | 7.4                  | 65             | 4                    | Positive |
| AME                        | 271                 | 256               | 12.03                | 110            | 22                   | Negative |
| AME                        | 271                 | 228               | 12.03                | 110            | 28                   | Negative |
| AME-d3                     | 274                 | 256               | 12.03                | 110            | 22                   | Negative |
| AME-d3                     | 274                 | 228               | 12.03                | 110            | 28                   | Negative |
| Amidosulfuron              | 370                 | 261               | 5.7                  | 100            | 12                   | Positive |
| Amidosulfuron              | 370                 | 218               | 5.7                  | 100            | 22                   | Positive |
| Aminocarb                  | 209                 | 152               | 8.5                  | 105            | 12                   | Positive |
| Aminocarb                  | 209                 | 137               | 8.5                  | 105            | 24                   | Positive |
| AOH                        | 257                 | 215               | 9.3                  | 110            | 26                   | Negative |
| AOH                        | 257                 | 213               | 9.3                  | 110            | 26                   | Negative |
| AOH                        | 257                 | 147               | 9.3                  | 110            | 34                   | Negative |
| AOH-d2                     | 259                 | 216               | 9.3                  | 110            | 24                   | Negative |
| AOH-d2                     | 259                 | 215               | 9.3                  | 110            | 24                   | Negative |



|                 |       |     |      |     |    |          |
|-----------------|-------|-----|------|-----|----|----------|
| AOH-d2          | 259   | 214 | 9.3  | 110 | 24 | Negative |
| AOH-d2          | 259   | 213 | 9.3  | 110 | 24 | Negative |
| Atropine        | 290   | 124 | 6.2  | 135 | 26 | Positive |
| Atropine        | 290   | 93  | 6.2  | 135 | 35 | Positive |
| Atropine-d5     | 295   | 124 | 6.2  | 135 | 26 | Positive |
| Avermectin B1a  | 890.5 | 567 | 16.1 | 120 | 5  | Positive |
| Avermectin B1a  | 890.5 | 305 | 16.1 | 120 | 24 | Positive |
| Azaconazole     | 300   | 231 | 10.1 | 140 | 16 | Positive |
| Azaconazole     | 300   | 159 | 10.1 | 140 | 32 | Positive |
| Azamethiphos    | 325   | 183 | 8.1  | 120 | 12 | Positive |
| Azamethiphos    | 325   | 112 | 8.1  | 120 | 37 | Positive |
| Azinphos-ethyl  | 346   | 137 | 12   | 120 | 32 | Positive |
| Azinphos-ethyl  | 346   | 132 | 12   | 120 | 31 | Positive |
| Azinphos-methyl | 318   | 261 | 10.4 | 60  | 0  | Positive |
| Azinphos-methyl | 318   | 132 | 10.4 | 60  | 8  | Positive |
| Azoxystrobin    | 404   | 372 | 10.8 | 110 | 12 | Positive |
| Azoxystrobin    | 404   | 344 | 10.8 | 110 | 24 | Positive |
| Beflubutamid    | 356   | 162 | 12.7 | 145 | 24 | Positive |
| Beflubutamid    | 356   | 91  | 12.7 | 145 | 28 | Positive |
| Benalaxyl       | 326   | 294 | 12.9 | 100 | 5  | Positive |
| Benalaxyl       | 326   | 148 | 12.9 | 100 | 17 | Positive |
| Benfuracarb     | 411   | 252 | 14.2 | 95  | 12 | Positive |
| Benfuracarb     | 411   | 195 | 14.2 | 95  | 22 | Positive |
| Benzoximate     | 364   | 199 | 13.4 | 83  | 4  | Positive |
| Benzoximate     | 364   | 105 | 13.4 | 83  | 22 | Positive |
| Bifenazate      | 301   | 198 | 11.8 | 95  | 5  | Positive |
| Bifenazate      | 301   | 170 | 11.8 | 95  | 17 | Positive |
| Bifenthrin      | 440   | 181 | 16.5 | 110 | 5  | Positive |
| Bifenthrin      | 440   | 166 | 16.5 | 110 | 22 | Positive |
| Bispyribac      | 431   | 413 | 9.6  | 115 | 12 | Positive |
| Bispyribac      | 431   | 275 | 9.6  | 115 | 5  | Positive |
| Bitertanol      | 338   | 269 | 13.3 | 65  | 0  | Positive |
| Bitertanol      | 338   | 70  | 13.3 | 65  | 0  | Positive |
| Bosclid         | 343   | 307 | 11.2 | 145 | 12 | Positive |
| Bosclid         | 343   | 271 | 11.2 | 145 | 28 | Positive |
| Bromuconazole   | 378   | 159 | 11.7 | 115 | 35 | Positive |
| Bromuconazole   | 378   | 70  | 11.7 | 115 | 22 | Positive |
| Bupirimate      | 317   | 166 | 12.5 | 125 | 22 | Positive |
| Bupirimate      | 317   | 108 | 12.5 | 125 | 24 | Positive |
| Buprofezin      | 306   | 201 | 14.5 | 105 | 5  | Positive |
| Buprofezin      | 306   | 116 | 14.5 | 105 | 12 | Positive |



|                             |     |     |      |     |    |          |
|-----------------------------|-----|-----|------|-----|----|----------|
| Butocarboxim1               | 208 | 116 | 5.5  | 65  | 12 | Positive |
| Butocarboxim1               | 208 | 75  | 5.5  | 65  | 22 | Positive |
| Butocarboxim2               | 213 | 156 | 7.3  | 65  | 5  | Positive |
| Butocarboxim2               | 213 | 75  | 7.3  | 65  | 12 | Positive |
| Carbaryl                    | 202 | 145 | 8.8  | 65  | 0  | Positive |
| Carbaryl                    | 202 | 127 | 8.8  | 65  | 24 | Positive |
| Carbendazim                 | 192 | 160 | 6.9  | 105 | 17 | Positive |
| Carbendazim                 | 192 | 132 | 6.9  | 105 | 28 | Positive |
| Carbofuran                  | 222 | 165 | 8.4  | 83  | 5  | Positive |
| Carbofuran                  | 222 | 123 | 8.4  | 83  | 22 | Positive |
| Carbosulfan                 | 381 | 160 | 16.2 | 105 | 8  | Positive |
| Carbosulfan                 | 381 | 118 | 16.2 | 105 | 16 | Positive |
| Carboxin                    | 236 | 143 | 8.8  | 105 | 12 | Positive |
| Carboxin                    | 236 | 93  | 8.8  | 105 | 37 | Positive |
| Carfentrazone-ethyl         | 412 | 366 | 12.7 | 140 | 17 | Positive |
| Carfentrazone-ethyl         | 412 | 346 | 12.7 | 140 | 22 | Positive |
| Chlorantraniliprole         | 484 | 453 | 10.4 | 105 | 17 | Positive |
| Chlorantraniliprole         | 484 | 286 | 10.4 | 105 | 12 | Positive |
| Chlorfenvinphos             | 359 | 170 | 13   | 105 | 37 | Positive |
| Chlorfenvinphos             | 359 | 155 | 13   | 105 | 8  | Positive |
| Chloridazon                 | 222 | 104 | 6.5  | 140 | 24 | Positive |
| Chloridazon                 | 222 | 77  | 6.5  | 140 | 35 | Positive |
| Chlorotoluron               | 213 | 140 | 9.4  | 120 | 22 | Positive |
| Chlorotoluron               | 213 | 72  | 9.4  | 120 | 22 | Positive |
| Chloroxuron                 | 291 | 164 | 11.7 | 140 | 12 | Positive |
| Chloroxuron                 | 291 | 72  | 11.7 | 140 | 22 | Positive |
| Chlorpyriphos-ethyl         | 352 | 200 | 14.9 | 110 | 17 | Positive |
| Chlorpyriphos-ethyl         | 350 | 198 | 14.9 | 110 | 17 | Positive |
| Chlorpyriphos-ethyl<br>-d10 | 360 | 199 | 14.8 | 110 | 17 | Positive |
| Chlorpyriphos-ethyl<br>-d10 | 360 | 163 | 14.8 | 110 | 21 | Positive |
| Chlorpyriphos-ethyl<br>-d10 | 360 | 99  | 14.8 | 110 | 17 | Positive |
| Chlorpyriphos-<br>methyl    | 322 | 290 | 13.7 | 110 | 12 | Positive |
| Chlorpyriphos-<br>methyl    | 322 | 125 | 13.7 | 110 | 24 | Positive |
| Chlorsulfuron               | 358 | 167 | 6.3  | 120 | 12 | Positive |
| Chlorsulfuron               | 358 | 141 | 6.3  | 120 | 17 | Positive |
| Clethodim                   | 360 | 268 | 9.2  | 110 | 12 | Positive |



|                |      |      |      |     |    |          |
|----------------|------|------|------|-----|----|----------|
| Clethodim      | 360  | 164  | 9.2  | 110 | 17 | Positive |
| Clethodim2     | 360  | 268  | 10.1 | 110 | 12 | Positive |
| Clethodim2     | 360  | 164  | 10.1 | 110 | 17 | Positive |
| Clofentezin    | 303  | 138  | 13.4 | 110 | 12 | Positive |
| Clofentezin    | 303  | 102  | 13.4 | 110 | 37 | Positive |
| Clomazone      | 240  | 125  | 10.5 | 65  | 17 | Positive |
| Clomazone      | 240  | 89   | 10.5 | 65  | 45 | Positive |
| Coumaphos      | 363  | 307  | 13   | 120 | 16 | Positive |
| Coumaphos      | 363  | 227  | 13   | 120 | 28 | Positive |
| Cyazofamid     | 325  | 261  | 12.2 | 100 | 5  | Positive |
| Cyazofamid     | 325  | 108  | 12.2 | 100 | 12 | Positive |
| Cycloate       | 216  | 82.9 | 13.7 | 100 | 12 | Positive |
| Cycloate       | 216  | 55   | 13.7 | 100 | 36 | Positive |
| Cycluron       | 199  | 89   | 10   | 120 | 12 | Positive |
| Cycluron       | 199  | 72   | 10   | 120 | 28 | Positive |
| Cymiazol       | 219  | 171  | 11.8 | 95  | 24 | Positive |
| Cymiazol       | 219  | 144  | 11.8 | 95  | 35 | Positive |
| Cymoxanil      | 199  | 128  | 6.8  | 50  | 0  | Positive |
| Cymoxanil      | 199  | 111  | 6.8  | 50  | 17 | Positive |
| Cypermethrin   | 433  | 208  | 15.5 | 120 | 17 | Positive |
| Cypermethrin   | 433  | 191  | 15.5 | 120 | 12 | Positive |
| Cypermethrin   | 433  | 163  | 15.5 | 120 | 24 | Positive |
| Cypermethrin   | 433  | 127  | 15.5 | 120 | 24 | Positive |
| Cyproconazole  | 292  | 125  | 11.8 | 110 | 35 | Positive |
| Cyproconazole  | 292  | 70   | 11.8 | 110 | 17 | Positive |
| Cyprodinil     | 226  | 93   | 12.9 | 140 | 37 | Positive |
| Cyprodinil     | 226  | 77   | 12.9 | 140 | 45 | Positive |
| DEET           | 1924 | 119  | 9.8  | 110 | 16 | Positive |
| DEET           | 1924 | 91   | 9.8  | 110 | 32 | Positive |
| Deltamethrin   | 523  | 506  | 15.6 | 120 | 8  | Positive |
| Deltamethrin   | 523  | 281  | 15.6 | 120 | 14 | Positive |
| Desmedipham    | 318  | 182  | 10.3 | 83  | 5  | Positive |
| Desmedipham    | 318  | 136  | 10.3 | 83  | 24 | Positive |
| Diazinon       | 305  | 169  | 13   | 105 | 22 | Positive |
| Diazinon       | 305  | 153  | 13   | 105 | 22 | Positive |
| Dichlorvos     | 221  | 109  | 8.2  | 110 | 12 | Positive |
| Dichlorvos     | 221  | 79   | 8.2  | 110 | 24 | Positive |
| Diethofencarb  | 268  | 226  | 10.8 | 65  | 0  | Positive |
| Diethofencarb  | 268  | 124  | 10.8 | 65  | 28 | Positive |
| Difenoconazole | 406  | 337  | 13.6 | 120 | 17 | Positive |
| Difenoconazole | 406  | 251  | 13.6 | 120 | 24 | Positive |



|                        |       |     |      |     |    |          |
|------------------------|-------|-----|------|-----|----|----------|
| Diflubenzuron          | 311   | 158 | 12.4 | 83  | 12 | Positive |
| Diflubenzuron          | 311   | 141 | 12.4 | 83  | 35 | Positive |
| Diflufenican           | 395   | 266 | 13.8 | 140 | 24 | Positive |
| Diflufenican           | 395   | 246 | 13.8 | 140 | 37 | Positive |
| Dimethachlor           | 256   | 224 | 10.2 | 120 | 12 | Positive |
| Dimethachlor           | 256   | 148 | 10.2 | 120 | 24 | Positive |
| Dimethoate             | 230   | 199 | 6.4  | 65  | 0  | Positive |
| Dimethoate             | 230   | 125 | 6.4  | 65  | 22 | Positive |
| Dimethomorph           | 388   | 301 | 11.4 | 145 | 22 | Positive |
| Dimethomorph           | 388   | 165 | 11.4 | 145 | 28 | Positive |
| Dimoxystrobin          | 327   | 205 | 12.6 | 115 | 5  | Positive |
| Dimoxystrobin          | 327   | 116 | 12.6 | 115 | 22 | Positive |
| Diniconazole           | 326   | 159 | 13.5 | 110 | 28 | Positive |
| Diniconazole           | 326   | 70  | 13.5 | 110 | 24 | Positive |
| Dinotefuran            | 203   | 129 | 4.6  | 183 | 8  | Positive |
| Dinotefuran            | 203   | 114 | 4.6  | 183 | 12 | Positive |
| Dioxacarb              | 224   | 167 | 6.4  | 83  | 12 | Positive |
| Dioxacarb              | 224   | 123 | 6.4  | 83  | 12 | Positive |
| Disulfoton             | 275   | 89  | 14.3 | 140 | 5  | Positive |
| Disulfoton             | 275   | 61  | 14.3 | 140 | 37 | Positive |
| Diuron                 | 235   | 72  | 10   | 110 | 22 | Positive |
| Diuron                 | 233   | 72  | 10   | 110 | 22 | Positive |
| DON                    | 297   | 249 | 5    | 110 | 4  | Positive |
| DON                    | 297   | 203 | 5    | 110 | 12 | Positive |
| DON- <sup>13</sup> C15 | 312   | 263 | 5    | 110 | 4  | Positive |
| Epoxyconazol           | 330   | 121 | 12.1 | 110 | 22 | Positive |
| Epoxyconazol           | 330   | 101 | 12.1 | 110 | 45 | Positive |
| Ergocornine            | 562.4 | 305 | 12   | 147 | 24 | Positive |
| Ergocornine            | 562.4 | 277 | 12   | 147 | 24 | Positive |
| Ergocornine            | 562.4 | 223 | 12   | 147 | 36 | Positive |
| Ergocorninine          | 562.4 | 305 | 13.3 | 147 | 24 | Positive |
| Ergocorninine          | 562.4 | 277 | 13.3 | 147 | 24 | Positive |
| Ergocorninine          | 562.4 | 223 | 13.3 | 147 | 36 | Positive |
| Ergocristine           | 610.4 | 305 | 12.7 | 172 | 24 | Positive |
| Ergocristine           | 610.4 | 268 | 12.7 | 172 | 24 | Positive |
| Ergocristine           | 610.4 | 223 | 12.7 | 172 | 36 | Positive |
| Ergocristinine         | 610.4 | 305 | 14   | 162 | 28 | Positive |
| Ergocristinine         | 610.4 | 268 | 14   | 162 | 24 | Positive |
| Ergocristinine         | 610.4 | 223 | 14   | 162 | 36 | Positive |
| Ergocryptine           | 576.4 | 305 | 12.6 | 152 | 24 | Positive |
| Ergocryptine           | 576.4 | 291 | 12.6 | 152 | 24 | Positive |



|                |       |       |      |     |    |          |
|----------------|-------|-------|------|-----|----|----------|
| Ergocryptine   | 576.4 | 223   | 12.6 | 152 | 36 | Positive |
| Ergocryptinine | 576.4 | 305   | 13.8 | 201 | 28 | Positive |
| Ergocryptinine | 576.4 | 291   | 13.8 | 201 | 24 | Positive |
| Ergocryptinine | 576.4 | 223   | 13.8 | 201 | 36 | Positive |
| Ergometrine    | 326   | 223   | 7.1  | 147 | 22 | Positive |
| Ergometrine    | 326   | 208   | 7.1  | 147 | 36 | Positive |
| Ergometrine    | 326   | 197   | 7.1  | 147 | 22 | Positive |
| Ergometrinine  | 326   | 265   | 8.5  | 152 | 16 | Positive |
| Ergometrinine  | 326   | 223   | 8.5  | 152 | 24 | Positive |
| Ergometrinine  | 326   | 208   | 8.5  | 152 | 28 | Positive |
| Ergosine       | 548.4 | 530   | 11.5 | 152 | 12 | Positive |
| Ergosine       | 548.4 | 223   | 11.5 | 152 | 28 | Positive |
| Ergosine       | 548.4 | 208   | 11.5 | 152 | 50 | Positive |
| Ergosinine     | 548.4 | 530   | 12.7 | 196 | 12 | Positive |
| Ergosinine     | 548.4 | 223   | 12.7 | 196 | 32 | Positive |
| Ergosinine     | 548.4 | 208   | 12.7 | 196 | 50 | Positive |
| Ergotamine     | 582.4 | 277   | 11.9 | 167 | 24 | Positive |
| Ergotamine     | 582.4 | 223   | 11.9 | 167 | 32 | Positive |
| Ergotamine     | 582.4 | 208   | 11.9 | 167 | 50 | Positive |
| Ergotaminine   | 582.4 | 277   | 13.2 | 167 | 24 | Positive |
| Ergotaminine   | 582.4 | 223   | 13.2 | 167 | 36 | Positive |
| Ergotaminine   | 582.4 | 208   | 13.2 | 167 | 50 | Positive |
| Ethidimuron    | 265   | 207.9 | 6.1  | 120 | 12 | Positive |
| Ethidimuron    | 265   | 57    | 6.1  | 120 | 32 | Positive |
| Ethion         | 385   | 199   | 14.7 | 95  | 4  | Positive |
| Ethion         | 385   | 143   | 14.7 | 95  | 22 | Positive |
| Ethirimol      | 210   | 140   | 10   | 145 | 22 | Positive |
| Ethirimol      | 210   | 98    | 10   | 145 | 24 | Positive |
| Ethofumesat    | 287   | 259   | 10.9 | 83  | 0  | Positive |
| Ethofumesat    | 287   | 121   | 10.9 | 83  | 12 | Positive |
| Ethoprophos    | 243   | 131   | 12.1 | 100 | 17 | Positive |
| Ethoprophos    | 243   | 97    | 12.1 | 100 | 28 | Positive |
| Ethoxyquin     | 218   | 174   | 12.2 | 120 | 28 | Positive |
| Ethoxyquin     | 218   | 160   | 12.2 | 120 | 35 | Positive |
| Etofenprox     | 394   | 177   | 16.5 | 110 | 12 | Positive |
| Etofenprox     | 394   | 107   | 16.5 | 110 | 45 | Positive |
| Etrimphos      | 293   | 265   | 12.9 | 120 | 22 | Positive |
| Etrimphos      | 293   | 125   | 12.9 | 120 | 35 | Positive |
| Famoxadone     | 392   | 331   | 13.1 | 85  | 0  | Positive |
| Famoxadone     | 392   | 238   | 13.1 | 85  | 12 | Positive |
| FB1            | 722.4 | 352.3 | 8.3  | 183 | 45 | Positive |



|                        |       |       |       |     |    |          |
|------------------------|-------|-------|-------|-----|----|----------|
| FB1                    | 722.4 | 334.3 | 8.3   | 183 | 45 | Positive |
| FB1- <sup>13</sup> C34 | 756.5 | 356.4 | 8.3   | 183 | 45 | Positive |
| FB2                    | 706.5 | 336.3 | 10.9  | 183 | 45 | Positive |
| FB2                    | 706.5 | 318.3 | 10.9  | 183 | 45 | Positive |
| FB2- <sup>13</sup> C34 | 740.5 | 358.3 | 10.9  | 183 | 45 | Positive |
| FB3                    | 706.5 | 336.3 | 9.8   | 183 | 45 | Positive |
| FB3                    | 706.5 | 318.3 | 9.8   | 183 | 45 | Positive |
| FB3- <sup>13</sup> C34 | 740.5 | 358.3 | 9.8   | 183 | 45 | Positive |
| Fenamidon              | 312   | 236   | 11.1  | 110 | 12 | Positive |
| Fenamidon              | 312   | 92    | 11.1  | 110 | 24 | Positive |
| Fenamiphos             | 304   | 217   | 12.4  | 110 | 22 | Positive |
| Fenamiphos             | 304   | 202   | 12.4  | 110 | 35 | Positive |
| Fenarimol              | 331   | 268   | 12    | 140 | 22 | Positive |
| Fenarimol              | 331   | 81    | 12    | 140 | 28 | Positive |
| Fenazaquin             | 307   | 161   | 15.8  | 105 | 12 | Positive |
| Fenazaquin             | 307   | 57    | 15.8  | 105 | 24 | Positive |
| Fenbuconazole          | 337   | 125   | 12.3  | 145 | 35 | Positive |
| Fenbuconazole          | 337   | 70    | 12.3  | 145 | 17 | Positive |
| Fenhexamid             | 302   | 97    | 11.9  | 140 | 22 | Positive |
| Fenhexamid             | 302   | 55    | 11.9  | 140 | 37 | Positive |
| Fenobucarb             | 208   | 152   | 10.7  | 65  | 5  | Positive |
| Fenobucarb             | 208   | 95    | 10.7  | 65  | 12 | Positive |
| Fenoxycarb             | 302   | 116   | 12.5  | 100 | 5  | Positive |
| Fenoxycarb             | 302   | 88    | 12.5  | 100 | 17 | Positive |
| Fenpropidin            | 274   | 147   | 14.1  | 120 | 28 | Positive |
| Fenpropidin            | 274   | 86    | 14.1  | 120 | 24 | Positive |
| Fenpyroximat           | 422   | 366   | 15.3  | 135 | 17 | Positive |
| Fenpyroximat           | 422   | 135   | 15.3  | 135 | 28 | Positive |
| Fenuron                | 165   | 76.9  | 6.2   | 183 | 32 | Positive |
| Fenuron                | 165   | 72    | 6.2   | 183 | 16 | Positive |
| Fipronil               | 435   | 330   | 12.5  | 65  | 12 | Negative |
| Fipronil               | 435   | 250   | 12.5  | 65  | 28 | Negative |
| Flazasulfuron          | 408   | 182   | 6.4   | 120 | 17 | Positive |
| Flazasulfuron          | 408   | 139   | 6.4   | 120 | 37 | Positive |
| Flonicamid             | 230   | 203   | 5.1   | 110 | 17 | Positive |
| Flonicamid             | 230   | 174   | 5.1   | 110 | 17 | Positive |
| Fluazinam              | 463   | 416   | 13.76 | 115 | 13 | Negative |
| Fluazinam              | 463   | 398   | 13.76 | 115 | 9  | Negative |
| Flubendiamide          | 681   | 273.7 | 12.7  | 120 | 12 | Negative |
| Flubendiamide          | 681   | 254   | 12.7  | 120 | 24 | Negative |
| Fludioxonil            | 247   | 169   | 11.1  | 95  | 32 | Negative |



|                     |       |      |      |     |    |          |
|---------------------|-------|------|------|-----|----|----------|
| Fludioxonil         | 247   | 126  | 11.1 | 95  | 32 | Negative |
| Flufenacet          | 364   | 194  | 12.1 | 100 | 5  | Positive |
| Flufenacet          | 364   | 152  | 12.1 | 100 | 17 | Positive |
| Flufenoxuron        | 489   | 158  | 15.1 | 110 | 17 | Positive |
| Flufenoxuron        | 489   | 141  | 15.1 | 110 | 45 | Positive |
| Flumetsulam         | 326   | 262  | 5.3  | 135 | 17 | Positive |
| Flumetsulam         | 326   | 129  | 5.3  | 135 | 22 | Positive |
| Flumioxazin         | 355   | 327  | 10.4 | 110 | 22 | Positive |
| Flumioxazin         | 355   | 299  | 10.4 | 110 | 28 | Positive |
| Fluometuron         | 233   | 72   | 9.3  | 105 | 17 | Positive |
| Fluometuron         | 233   | 46   | 9.3  | 105 | 17 | Positive |
| Fluometuron2        | 233   | 72   | 10   | 105 | 17 | Positive |
| Fluometuron2        | 233   | 46   | 10   | 105 | 17 | Positive |
| Fluopicolide        | 383   | 173  | 11.4 | 110 | 24 | Positive |
| Fluopicolide        | 383   | 145  | 11.4 | 110 | 45 | Positive |
| Fluoxastrobin       | 459   | 427  | 11.9 | 140 | 17 | Positive |
| Fluoxastrobin       | 459   | 188  | 11.9 | 140 | 37 | Positive |
| Fluquinconazole     | 376   | 349  | 11.9 | 120 | 16 | Positive |
| Fluquinconazole     | 376   | 307  | 11.9 | 120 | 24 | Positive |
| Flusilazole         | 316   | 247  | 12.4 | 120 | 17 | Positive |
| Flusilazole         | 316   | 165  | 12.4 | 120 | 24 | Positive |
| Flutriafol          | 302   | 123  | 9.7  | 100 | 28 | Positive |
| Flutriafol          | 302   | 70   | 9.7  | 100 | 17 | Positive |
| Fonofos             | 247   | 137  | 13   | 120 | 17 | Positive |
| Fonofos             | 247   | 109  | 13   | 120 | 35 | Positive |
| Foramsulfuron       | 453   | 182  | 6.15 | 120 | 22 | Positive |
| Foramsulfuron       | 453   | 139  | 6.15 | 120 | 45 | Positive |
| Forchlorfenuron     | 248   | 129  | 10   | 110 | 16 | Positive |
| Forchlorfenuron     | 248   | 93   | 10   | 110 | 37 | Positive |
| Fosthiazate         | 284   | 228  | 9.3  | 100 | 5  | Positive |
| Fosthiazate         | 284   | 104  | 9.3  | 100 | 22 | Positive |
| Fuberidazol         | 185   | 157  | 8    | 145 | 22 | Positive |
| Fuberidazol         | 185   | 156  | 8    | 145 | 28 | Positive |
| Furalaxyl           | 302   | 242  | 10.8 | 110 | 12 | Positive |
| Furalaxyl           | 302   | 95   | 10.8 | 110 | 27 | Positive |
| Furathiocarb        | 383   | 252  | 14.3 | 110 | 5  | Positive |
| Furathiocarb        | 383   | 195  | 14.3 | 110 | 17 | Positive |
| Halofenozide        | 329   | 121  | 11   | 105 | 16 | Negative |
| Halofenozide        | 329   | 76.9 | 11   | 105 | 36 | Negative |
| Halosulfuron-methyl | 434.7 | 182  | 7.5  | 110 | 17 | Positive |



|                         |       |       |      |     |    |          |
|-------------------------|-------|-------|------|-----|----|----------|
| Halosulfuron-methyl     | 434.7 | 139   | 7.5  | 110 | 45 | Positive |
| Hexaconazole            | 314   | 159   | 13.2 | 95  | 28 | Positive |
| Hexaconazole            | 314   | 70    | 13.2 | 95  | 17 | Positive |
| Hexaflumuron            | 461   | 158   | 13.9 | 120 | 17 | Positive |
| Hexaflumuron            | 461   | 141   | 13.9 | 120 | 45 | Positive |
| Hexythiazox             | 353   | 228   | 14.8 | 100 | 12 | Positive |
| Hexythiazox             | 353   | 168   | 14.8 | 100 | 24 | Positive |
| HT-2                    | 442   | 263   | 9.9  | 110 | 12 | Positive |
| HT-2                    | 442   | 215   | 9.9  | 110 | 12 | Positive |
| HT-2- <sup>13</sup> C22 | 464   | 278   | 9.9  | 110 | 12 | Positive |
| Hydramethylnon          | 495   | 323   | 14.3 | 200 | 36 | Positive |
| Hydramethylnon          | 495   | 170.9 | 14.3 | 200 | 48 | Positive |
| Imazalil                | 297   | 201   | 10.1 | 115 | 17 | Positive |
| Imazalil                | 297   | 159   | 10.1 | 115 | 22 | Positive |
| Imidacloprid            | 256   | 209   | 6    | 83  | 12 | Positive |
| Imidacloprid            | 256   | 175   | 6    | 83  | 17 | Positive |
| Indoxacarb              | 528   | 203   | 13.7 | 110 | 45 | Positive |
| Indoxacarb              | 528   | 150   | 13.7 | 110 | 22 | Positive |
| Ipconazole              | 334   | 125   | 13.9 | 115 | 45 | Positive |
| Ipconazole              | 334   | 70    | 13.9 | 115 | 24 | Positive |
| Iprovalicarb            | 321   | 203   | 11.9 | 83  | 0  | Positive |
| Iprovalicarb            | 321   | 119   | 11.9 | 83  | 22 | Positive |
| Isocarbophos            | 231   | 121   | 10   | 110 | 22 | Positive |
| Isocarbophos            | 231   | 65    | 10   | 110 | 37 | Positive |
| Isofenphos-methyl       | 332   | 231   | 12.8 | 145 | 12 | Positive |
| Isofenphos-methyl       | 332   | 121   | 12.8 | 145 | 37 | Positive |
| Isoprothiolane          | 291   | 231   | 11.4 | 83  | 8  | Positive |
| Isoprothiolane          | 291   | 188.8 | 11.4 | 83  | 22 | Positive |
| Isoxaben                | 333   | 165   | 11.3 | 110 | 16 | Positive |
| Isoxaben                | 333   | 150   | 11.3 | 110 | 48 | Positive |
| Isoxaflutole            | 359.8 | 250.9 | 7.5  | 95  | 22 | Positive |
| Isoxaflutole            | 359.8 | 220   | 7.5  | 95  | 35 | Positive |
| Isoxaflutole2           | 359.8 | 250.9 | 9.9  | 95  | 22 | Positive |
| Isoxaflutole2           | 359.8 | 220   | 9.9  | 95  | 35 | Positive |
| Ivermectin B1a          | 892.5 | 551.3 | 16.8 | 120 | 16 | Positive |
| Ivermectin B1a          | 892.5 | 307   | 16.8 | 120 | 28 | Positive |
| Ivermectin B1b          | 861.5 | 495.8 | 14.1 | 120 | 12 | Positive |
| Ivermectin B1b          | 861.5 | 323   | 14.1 | 120 | 60 | Positive |
| Kresoxim-methyl         | 314   | 267   | 12.7 | 85  | 0  | Positive |
| Kresoxim-methyl         | 314   | 222   | 12.7 | 85  | 12 | Positive |



|                     |        |       |      |     |    |          |
|---------------------|--------|-------|------|-----|----|----------|
| Lenacil             | 235    | 153   | 9.7  | 85  | 17 | Positive |
| Lenacil             | 235    | 136   | 9.7  | 85  | 35 | Positive |
| Linuron             | 249    | 182   | 10.8 | 110 | 12 | Positive |
| Linuron             | 249    | 160   | 10.8 | 110 | 17 | Positive |
| Lufenuron           | 510.9  | 158   | 14.6 | 138 | 22 | Positive |
| Lufenuron           | 510.9  | 141   | 14.6 | 138 | 45 | Positive |
| Malaoxon            | 315.07 | 127   | 8.6  | 85  | 4  | Positive |
| Malaoxon            | 315.07 | 99    | 8.6  | 85  | 22 | Positive |
| Malathion           | 331    | 126.9 | 11.4 | 83  | 5  | Positive |
| Malathion           | 331    | 99    | 11.4 | 83  | 12 | Positive |
| Mandipropamid       | 411.9  | 356   | 11.3 | 110 | 5  | Positive |
| Mandipropamid       | 411.9  | 328   | 11.3 | 110 | 12 | Positive |
| Mecarbam            | 330    | 227   | 12   | 65  | 0  | Positive |
| Mecarbam            | 330    | 97    | 12   | 65  | 45 | Positive |
| Mepanipyrim         | 224    | 209   | 11.9 | 140 | 16 | Positive |
| Mepanipyrim         | 224    | 106   | 11.9 | 140 | 24 | Positive |
| Mesosulfuron-methyl | 504    | 182   | 6.5  | 125 | 24 | Positive |
| Mesosulfuron-methyl | 504    | 139   | 6.5  | 125 | 45 | Positive |
| Metaflumizone       | 507    | 287   | 14.4 | 140 | 22 | Positive |
| Metaflumizone       | 507    | 178   | 14.4 | 140 | 22 | Positive |
| Metalaxyl           | 280    | 220   | 9.9  | 95  | 12 | Positive |
| Metalaxyl           | 280    | 160   | 9.9  | 95  | 22 | Positive |
| Metamitron          | 203    | 175   | 6.3  | 110 | 17 | Positive |
| Metamitron          | 203    | 104   | 6.3  | 110 | 22 | Positive |
| Metazachlor         | 278    | 210   | 9.7  | 65  | 0  | Positive |
| Metazachlor         | 278    | 134   | 9.7  | 65  | 17 | Positive |
| Metconazole         | 320    | 125   | 13.2 | 140 | 37 | Positive |
| Metconazole         | 320    | 70    | 13.2 | 140 | 22 | Positive |
| Methabenzthiazuron  | 222    | 165   | 9.6  | 100 | 17 | Positive |
| Methabenzthiazuron  | 222    | 150   | 9.6  | 100 | 35 | Positive |
| Methacrifos         | 241    | 209   | 10.3 | 55  | 0  | Positive |
| Methacrifos         | 241    | 125   | 10.3 | 55  | 28 | Positive |
| Methamidophos       | 141.9  | 125   | 2    | 85  | 12 | Positive |
| Methamidophos       | 141.9  | 94    | 2    | 85  | 12 | Positive |
| Methidathion        | 302.9  | 145   | 10.2 | 55  | 0  | Positive |
| Methidathion        | 302.9  | 85    | 10.2 | 55  | 17 | Positive |
| Methiocarb          | 226    | 169   | 11   | 65  | 0  | Positive |
| Methiocarb          | 226    | 121   | 11   | 65  | 17 | Positive |
| Methomyl            | 162.9  | 106   | 5.1  | 50  | 5  | Positive |



|                        |       |       |      |     |    |          |
|------------------------|-------|-------|------|-----|----|----------|
| Methomyl               | 162.9 | 88    | 5.1  | 50  | 0  | Positive |
| Methoprotetryne        | 272   | 198   | 10.8 | 140 | 24 | Positive |
| Methoprotetryne        | 272   | 169.9 | 10.8 | 140 | 28 | Positive |
| Methoxyfenozide        | 369   | 313   | 11.5 | 85  | 0  | Positive |
| Methoxyfenozide        | 369   | 149   | 11.5 | 85  | 12 | Positive |
| Metobromuron           | 259   | 170   | 9.5  | 120 | 17 | Positive |
| Metobromuron           | 259   | 148   | 9.5  | 120 | 12 | Positive |
| Metolachlor            | 284   | 252   | 12.2 | 110 | 12 | Positive |
| Metolachlor            | 284   | 176   | 12.2 | 110 | 22 | Positive |
| Metrafenon             | 409   | 226.9 | 13.4 | 110 | 24 | Positive |
| Metrafenon             | 409   | 209   | 13.4 | 110 | 12 | Positive |
| Metribuzin             | 215   | 187   | 8.3  | 120 | 17 | Positive |
| Metribuzin             | 215   | 84    | 8.3  | 120 | 22 | Positive |
| Metsulfuron-methyl     | 382   | 199   | 5.9  | 100 | 22 | Positive |
| Metsulfuron-methyl     | 382   | 167   | 5.9  | 100 | 17 | Positive |
| Mevinphos1             | 225   | 193   | 6.4  | 65  | 0  | Positive |
| Mevinphos1             | 225   | 127   | 6.4  | 65  | 12 | Positive |
| Mevinphos2             | 225   | 193   | 7    | 65  | 0  | Positive |
| Mevinphos2             | 225   | 127   | 7    | 65  | 12 | Positive |
| Mexacarbate            | 223   | 166   | 11.5 | 110 | 12 | Positive |
| Mexacarbate            | 223   | 151   | 11.5 | 110 | 24 | Positive |
| Molinate               | 188   | 126   | 11.5 | 100 | 12 | Positive |
| Molinate               | 188   | 83    | 11.5 | 100 | 17 | Positive |
| Monocrotophos          | 224   | 193   | 5.5  | 65  | 0  | Positive |
| Monocrotophos          | 224   | 127   | 5.5  | 65  | 12 | Positive |
| Moxidectin             | 640.4 | 622   | 16.5 | 148 | 12 | Positive |
| Moxidectin             | 640.4 | 528   | 16.5 | 148 | 4  | Positive |
| Myclobutanil           | 289   | 125   | 11.6 | 110 | 35 | Positive |
| Myclobutanil           | 289   | 70    | 11.6 | 110 | 17 | Positive |
| Nicosulfuron           | 4111  | 213   | 5.6  | 102 | 12 | Positive |
| Nicosulfuron           | 4111  | 182   | 5.6  | 105 | 16 | Positive |
| Nitenpyram             | 271   | 225   | 4.9  | 95  | 3  | Positive |
| Nitenpyram             | 271   | 56    | 4.9  | 95  | 28 | Positive |
| Novaluron              | 493   | 158   | 14   | 100 | 22 | Positive |
| Novaluron              | 493   | 141   | 14   | 100 | 45 | Positive |
| Omethoat               | 214   | 125   | 4    | 83  | 22 | Positive |
| Omethoat               | 214   | 109   | 4    | 83  | 24 | Positive |
| OTA                    | 404   | 358   | 9.6  | 120 | 12 | Positive |
| OTA                    | 404   | 239   | 9.6  | 120 | 24 | Positive |
| OTA                    | 404   | 221   | 9.6  | 120 | 37 | Positive |
| OTA- <sup>13</sup> C20 | 424   | 250   | 9.6  | 120 | 24 | Positive |



|                   |       |     |      |     |    |          |
|-------------------|-------|-----|------|-----|----|----------|
| Oxadiazon         | 345   | 303 | 14.6 | 100 | 12 | Positive |
| Oxadiazon         | 345   | 220 | 14.6 | 100 | 17 | Positive |
| Oxadixyl          | 279   | 219 | 7.7  | 65  | 5  | Positive |
| Oxadixyl          | 279   | 132 | 7.7  | 65  | 35 | Positive |
| Oxamyl            | 237   | 90  | 4.9  | 60  | 0  | Positive |
| Oxamyl            | 237   | 72  | 4.9  | 60  | 17 | Positive |
| Oxasulfuron       | 407   | 150 | 6.2  | 120 | 17 | Positive |
| Oxasulfuron       | 407   | 107 | 6.2  | 120 | 45 | Positive |
| Paclobutrazol     | 294   | 125 | 11.4 | 115 | 37 | Positive |
| Paclobutrazol     | 294   | 70  | 11.4 | 115 | 22 | Positive |
| Penconazole       | 284   | 159 | 12.7 | 65  | 28 | Positive |
| Penconazole       | 284   | 70  | 12.7 | 65  | 17 | Positive |
| Pencycuron        | 329   | 218 | 13.5 | 120 | 12 | Positive |
| Pencycuron        | 329   | 125 | 13.5 | 120 | 24 | Positive |
| Pendimethalin     | 282   | 212 | 14.9 | 85  | 5  | Positive |
| Pendimethalin     | 282   | 194 | 14.9 | 85  | 17 | Positive |
| Permethrin        | 391   | 355 | 10   | 120 | 6  | Positive |
| Permethrin        | 391   | 183 | 10   | 120 | 12 | Positive |
| Phenmedipham      | 318   | 168 | 10.4 | 100 | 4  | Positive |
| Phenmedipham      | 318   | 136 | 10.4 | 100 | 22 | Positive |
| Phenthoate        | 321   | 247 | 12.6 | 75  | 4  | Positive |
| Phenthoate        | 321   | 79  | 12.6 | 75  | 48 | Positive |
| Phosalone         | 368   | 182 | 13.3 | 65  | 12 | Positive |
| Phosalone         | 368   | 111 | 13.3 | 65  | 45 | Positive |
| Phosmet           | 317.9 | 160 | 10.5 | 65  | 12 | Positive |
| Phosmet           | 317.9 | 133 | 10.5 | 65  | 37 | Positive |
| Phosphamidon      | 300   | 174 | 7.8  | 110 | 8  | Positive |
| Phosphamidon      | 300   | 127 | 7.8  | 110 | 16 | Positive |
| Phoxim            | 299   | 129 | 13.2 | 65  | 4  | Positive |
| Phoxim            | 299   | 77  | 13.2 | 65  | 24 | Positive |
| Picolinafen       | 377   | 359 | 14.4 | 120 | 24 | Positive |
| Picolinafen       | 377   | 238 | 14.4 | 120 | 32 | Positive |
| Picoxystrobin     | 368   | 205 | 12.5 | 65  | 0  | Positive |
| Picoxystrobin     | 368   | 145 | 12.5 | 65  | 22 | Positive |
| Piperonylbutoxide | 356   | 177 | 14.6 | 120 | 13 | Positive |
| Piperonylbutoxide | 356   | 119 | 14.6 | 120 | 47 | Positive |
| Pirimicarb        | 239   | 182 | 9.4  | 110 | 12 | Positive |
| Pirimicarb        | 239   | 72  | 9.4  | 110 | 22 | Positive |
| Pirimiphos-ethyl  | 334   | 198 | 14.6 | 120 | 38 | Positive |
| Pirimiphos-ethyl  | 334   | 182 | 14.6 | 120 | 42 | Positive |
| Pirimiphos-methyl | 306   | 164 | 13.4 | 140 | 22 | Positive |



|                   |       |       |      |     |    |          |
|-------------------|-------|-------|------|-----|----|----------|
| Pirimiphos-methyl | 306   | 108   | 13.4 | 140 | 28 | Positive |
| Prochloraz        | 376   | 308   | 13.3 | 65  | 5  | Positive |
| Prochloraz        | 376   | 266   | 13.3 | 65  | 12 | Positive |
| Procymidon        | 301   | 284   | 12   | 65  | 8  | Positive |
| Procymidon        | 301   | 256   | 12   | 65  | 24 | Positive |
| Procymidon        | 284   | 255.8 | 12   | 110 | 12 | Positive |
| Procymidon        | 284   | 67    | 12   | 110 | 28 | Positive |
| Profenofos        | 374.9 | 347   | 14.2 | 120 | 5  | Positive |
| Profenofos        | 374.9 | 304.9 | 14.2 | 120 | 17 | Positive |
| Promecarb         | 208   | 151   | 11.2 | 83  | 0  | Positive |
| Promecarb         | 208   | 109   | 11.2 | 83  | 12 | Positive |
| Prometon          | 226   | 184   | 8.9  | 110 | 16 | Positive |
| Prometon          | 226   | 142   | 8.9  | 110 | 24 | Positive |
| Propamocarb       | 189   | 144   | 4.4  | 100 | 5  | Positive |
| Propamocarb       | 189   | 102   | 4.4  | 100 | 17 | Positive |
| Propaquizafop     | 444   | 371   | 14.5 | 125 | 12 | Positive |
| Propaquizafop     | 444   | 100   | 14.5 | 125 | 17 | Positive |
| Propargit         | 368   | 231   | 15.1 | 83  | 5  | Positive |
| Propargit         | 368   | 175   | 15.1 | 83  | 12 | Positive |
| Propetamophos     | 282   | 156   | 11.6 | 125 | 12 | Positive |
| Propetamophos     | 282   | 138   | 11.6 | 125 | 17 | Positive |
| Propham           | 180   | 138   | 9.6  | 60  | 4  | Positive |
| Propham           | 180   | 120   | 9.6  | 60  | 12 | Positive |
| Propiconazole     | 342   | 158.9 | 13   | 115 | 28 | Positive |
| Propiconazole     | 342   | 69    | 13   | 115 | 17 | Positive |
| Propoxur          | 210   | 168   | 8.3  | 55  | 0  | Positive |
| Propoxur          | 210   | 111   | 8.3  | 55  | 12 | Positive |
| Propyzamid        | 256   | 190   | 11.4 | 105 | 12 | Positive |
| Propyzamid        | 256   | 173   | 11.4 | 105 | 22 | Positive |
| Proquinazid       | 373   | 331   | 15.6 | 120 | 5  | Positive |
| Proquinazid       | 373   | 289   | 15.6 | 120 | 22 | Positive |
| Prosulfocarb      | 252   | 128   | 14   | 100 | 5  | Positive |
| Prosulfocarb      | 252   | 91    | 14   | 100 | 22 | Positive |
| Pymetrozin        | 218   | 105   | 5.4  | 110 | 22 | Positive |
| Pymetrozin        | 218   | 78    | 5.4  | 110 | 45 | Positive |
| Pyracarbolid      | 218   | 125   | 8.6  | 115 | 16 | Positive |
| Pyracarbolid      | 218   | 96.9  | 8.6  | 115 | 28 | Positive |
| Pyraclostrobin    | 388   | 194   | 13.2 | 95  | 5  | Positive |
| Pyraclostrobin    | 388   | 163   | 13.2 | 95  | 22 | Positive |
| Pyridaben         | 365   | 309   | 15.7 | 83  | 12 | Positive |
| Pyridaben         | 365   | 147   | 15.7 | 83  | 24 | Positive |



|                                  |       |       |      |     |    |          |
|----------------------------------|-------|-------|------|-----|----|----------|
| Pyridat                          | 379   | 350.8 | 16.1 | 110 | 4  | Positive |
| Pyridat                          | 379   | 207   | 16.1 | 110 | 12 | Positive |
| Pyrimethanil                     | 200   | 107   | 11   | 120 | 22 | Positive |
| Pyrimethanil                     | 200   | 82    | 11   | 120 | 24 | Positive |
| Pyriproxyfen                     | 322   | 185   | 14.8 | 110 | 22 | Positive |
| Pyriproxyfen                     | 322   | 96    | 14.8 | 110 | 12 | Positive |
| Quinalphos                       | 299   | 163   | 12.6 | 100 | 22 | Positive |
| Quinalphos                       | 299   | 147   | 12.6 | 100 | 22 | Positive |
| Quinmerac                        | 222   | 204   | 5.3  | 100 | 17 | Positive |
| Quinmerac                        | 222   | 141   | 5.3  | 100 | 35 | Positive |
| Quinoclamín                      | 208   | 88.9  | 8    | 125 | 44 | Positive |
| Quinoclamín                      | 208   | 76.9  | 8    | 125 | 44 | Positive |
| Quinoxifen                       | 308   | 197   | 14.8 | 115 | 35 | Positive |
| Quinoxifen                       | 308   | 162   | 14.8 | 115 | 45 | Positive |
| Rimsulfuron                      | 432   | 325   | 5.9  | 110 | 12 | Positive |
| Rimsulfuron                      | 432   | 182   | 5.9  | 110 | 22 | Positive |
| Rotenone                         | 395   | 213   | 12.4 | 145 | 22 | Positive |
| Rotenone                         | 395   | 192   | 12.4 | 145 | 22 | Positive |
| Scopolamine                      | 304   | 156   | 7.2  | 120 | 17 | Positive |
| Scopolamine                      | 304   | 137.9 | 7.2  | 120 | 23 | Positive |
| Scopolamine- <sup>13</sup> C1-d3 | 308   | 160   | 7.2  | 120 | 17 | Positive |
| Scopolamine- <sup>13</sup> C1-d3 | 308   | 142   | 7.2  | 120 | 23 | Positive |
| Sebumeton                        | 226   | 170   | 10.5 | 110 | 16 | Positive |
| Sebumeton                        | 226   | 67.9  | 10.5 | 110 | 50 | Positive |
| Silthiopham                      | 268   | 252   | 12.6 | 135 | 5  | Positive |
| Silthiopham                      | 268   | 139   | 12.6 | 135 | 17 | Positive |
| Spinosyn A                       | 732.4 | 142   | 16.3 | 155 | 28 | Positive |
| Spinosyn A                       | 732.4 | 98    | 16.3 | 155 | 45 | Positive |
| Spinosyn D                       | 746.5 | 142   | 16.7 | 145 | 35 | Positive |
| Spinosyn D                       | 746.5 | 98    | 16.7 | 145 | 55 | Positive |
| Spirodiclofen                    | 411   | 313   | 15.4 | 110 | 5  | Positive |
| Spirodiclofen                    | 411   | 71    | 15.4 | 110 | 17 | Positive |
| Spiromesifen                     | 388   | 273   | 15   | 110 | 12 | Positive |
| Spiromesifen                     | 388   | 255   | 15   | 110 | 24 | Positive |
| Spirotetramat                    | 374   | 330.3 | 11.9 | 120 | 12 | Positive |
| Spirotetramat                    | 374   | 302   | 11.9 | 120 | 12 | Positive |
| Spiroxamine                      | 298   | 144   | 14.9 | 125 | 17 | Positive |
| Spiroxamine                      | 298   | 100   | 14.9 | 125 | 35 | Positive |
| Sulfentrazone                    | 404   | 306.9 | 8.3  | 110 | 28 | Positive |



|                                    |       |       |      |     |    |          |
|------------------------------------|-------|-------|------|-----|----|----------|
| Sulfentrazone                      | 404   | 273   | 8.3  | 110 | 36 | Positive |
| Sulfotep                           | 323   | 115   | 12.8 | 120 | 31 | Positive |
| Sulfotep                           | 323   | 97    | 12.8 | 120 | 48 | Positive |
| T-2                                | 484.3 | 305   | 10.8 | 110 | 12 | Positive |
| T-2                                | 484.3 | 215   | 10.8 | 110 | 24 | Positive |
| T-2                                | 484.3 | 185   | 10.8 | 110 | 22 | Positive |
| T-2- <sup>13</sup> C <sub>24</sub> | 508.3 | 322   | 10.8 | 110 | 12 | Positive |
| TEA                                | 196   | 139   | 4.3  | 110 | 26 | Negative |
| TEA                                | 196   | 112   | 4.3  | 110 | 32 | Negative |
| TEA                                | 196   | 83    | 4.3  | 110 | 32 | Negative |
| TEA- <sup>13</sup> C <sub>2</sub>  | 198   | 141   | 4.3  | 110 | 26 | Negative |
| Tebuconazole                       | 308   | 125   | 12.9 | 110 | 37 | Positive |
| Tebuconazole                       | 308   | 70    | 12.9 | 110 | 22 | Positive |
| Tebufenozid                        | 353   | 297   | 12.5 | 95  | 0  | Positive |
| Tebufenozid                        | 353   | 133   | 12.5 | 95  | 17 | Positive |
| Tebufenpyrad                       | 334   | 145   | 14.4 | 145 | 24 | Positive |
| Tebufenpyrad                       | 334   | 117   | 14.4 | 145 | 37 | Positive |
| Tebuthiuron                        | 229   | 172   | 8.6  | 105 | 12 | Positive |
| Tebuthiuron                        | 229   | 116   | 8.6  | 105 | 24 | Positive |
| Teflubenzuron                      | 379   | 359   | 14.6 | 110 | 0  | Negative |
| Teflubenzuron                      | 379   | 339   | 14.6 | 110 | 4  | Negative |
| Temephos                           | 467   | 419   | 14.5 | 155 | 22 | Positive |
| Temephos                           | 467   | 124.9 | 14.5 | 155 | 44 | Positive |
| Tepraloxym1                        | 342   | 250   | 6.45 | 140 | 12 | Positive |
| Tepraloxym1                        | 342   | 166   | 6.45 | 140 | 22 | Positive |
| Tepraloxym2                        | 342   | 250   | 7.5  | 140 | 12 | Positive |
| Tepraloxym2                        | 342   | 166   | 7.5  | 140 | 22 | Positive |
| Terbufos                           | 289   | 232.9 | 14.5 | 110 | 0  | Positive |
| Terbufos                           | 289   | 57    | 14.5 | 110 | 16 | Positive |
| Tetrachlorvinphos                  | 367   | 206   | 12.6 | 120 | 39 | Positive |
| Tetrachlorvinphos                  | 367   | 127   | 12.6 | 120 | 48 | Positive |
| Tetraconazole                      | 372   | 159   | 12.1 | 140 | 28 | Positive |
| Tetraconazole                      | 372   | 70    | 12.1 | 140 | 22 | Positive |
| Tetrametrin                        | 349   | 164   | 14.2 | 120 | 35 | Positive |
| Tetrametrin                        | 349   | 107   | 14.2 | 120 | 50 | Positive |
| Thiabendazol                       | 202   | 175   | 7.7  | 140 | 24 | Positive |
| Thiabendazol                       | 202   | 131   | 7.7  | 140 | 35 | Positive |
| Thiacloprid                        | 253   | 126   | 6.95 | 110 | 22 | Positive |
| Thiacloprid                        | 253   | 90    | 6.95 | 110 | 37 | Positive |
| Thiamethoxam                       | 292   | 211   | 5.3  | 85  | 5  | Positive |
| Thiamethoxam                       | 292   | 181   | 5.3  | 85  | 22 | Positive |



|                       |       |       |       |     |    |          |
|-----------------------|-------|-------|-------|-----|----|----------|
| Thidiazuron           | 221   | 101.9 | 8.4   | 107 | 16 | Positive |
| Thidiazuron           | 221   | 77    | 8.4   | 107 | 50 | Positive |
| Thifensulfuron-methyl | 388   | 205   | 5.9   | 115 | 24 | Positive |
| Thifensulfuron-methyl | 388   | 167   | 5.9   | 115 | 12 | Positive |
| Thiodicarb            | 355   | 108   | 9.2   | 82  | 12 | Positive |
| Thiodicarb            | 355   | 88    | 9.2   | 82  | 12 | Positive |
| Thiofanox             | 241   | 184   | 9.3   | 110 | 5  | Positive |
| Thiofanox             | 241   | 57    | 9.3   | 110 | 17 | Positive |
| Tolclofos-methyl      | 301   | 269   | 13.4  | 115 | 12 | Positive |
| Tolclofos-methyl      | 301   | 125   | 13.4  | 115 | 17 | Positive |
| Tolylfluanide         | 346.9 | 238   | 12    | 65  | 0  | Positive |
| Tolylfluanide         | 346.9 | 137   | 12    | 65  | 24 | Positive |
| Tralkoxydim           | 330   | 284   | 16.4  | 165 | 5  | Positive |
| Tralkoxydim           | 330   | 138   | 16.4  | 165 | 17 | Positive |
| Tralkoxydim           | 330   | 96    | 16.4  | 165 | 24 | Positive |
| Triadimefon           | 294   | 197   | 11.5  | 100 | 12 | Positive |
| Triadimefon           | 294   | 69    | 11.5  | 100 | 22 | Positive |
| Triadimenol           | 296   | 99    | 11.85 | 65  | 12 | Positive |
| Triadimenol           | 296   | 70    | 11.85 | 65  | 5  | Positive |
| Triasulfuron          | 401.9 | 167   | 6.7   | 140 | 12 | Positive |
| Triasulfuron          | 401.9 | 141   | 6.7   | 140 | 12 | Positive |
| Triazophos            | 314   | 162   | 11.7  | 110 | 17 | Positive |
| Triazophos            | 314   | 119   | 11.7  | 110 | 35 | Positive |
| Tribenuron-methyl     | 396   | 181   | 6.4   | 110 | 17 | Positive |
| Tribenuron-methyl     | 396   | 155   | 6.4   | 110 | 5  | Positive |
| Trichlorfon           | 256.9 | 221   | 6.4   | 83  | 5  | Positive |
| Trichlorfon           | 256.9 | 109   | 6.4   | 83  | 17 | Positive |
| Tricyclazol           | 190   | 163   | 7.2   | 140 | 22 | Positive |
| Tricyclazol           | 190   | 136   | 7.2   | 140 | 28 | Positive |
| Trietazin             | 230   | 202   | 11.9  | 105 | 17 | Positive |
| Trietazin             | 230   | 99    | 11.9  | 105 | 24 | Positive |
| Trifloxystrobin       | 409   | 186   | 13.8  | 110 | 12 | Positive |
| Trifloxystrobin       | 409   | 145   | 13.8  | 110 | 45 | Positive |
| Triflumizol           | 346   | 278   | 13.9  | 85  | 5  | Positive |
| Triflumizol           | 346   | 73    | 13.9  | 85  | 12 | Positive |
| Triflumuron           | 359   | 156   | 13.3  | 100 | 12 | Positive |
| Triflumuron           | 359   | 139   | 13.3  | 100 | 35 | Positive |
| Trimethacarb          | 194   | 137   | 9.9   | 83  | 4  | Positive |
| Trimethacarb          | 194   | 122   | 9.9   | 83  | 28 | Positive |



|                        |     |       |      |     |    |          |
|------------------------|-----|-------|------|-----|----|----------|
| Triticonazole          | 318 | 125   | 12   | 100 | 37 | Positive |
| Triticonazole          | 318 | 70    | 12   | 100 | 12 | Positive |
| Uniconazole-P          | 292 | 125   | 12.4 | 135 | 36 | Positive |
| Uniconazole-P          | 292 | 70    | 12.4 | 135 | 24 | Positive |
| Vamidothion            | 288 | 146   | 6.4  | 95  | 8  | Positive |
| Vamidothion            | 288 | 58    | 6.4  | 95  | 50 | Positive |
| ZON                    | 317 | 175   | 11.5 | 110 | 24 | Negative |
| ZON                    | 317 | 130.8 | 11.5 | 110 | 33 | Negative |
| ZON- <sup>13</sup> C18 | 335 | 185   | 11.5 | 110 | 24 | Negative |
| Zoxamide               | 336 | 187   | 13   | 120 | 22 | Positive |
| Zoxamide               | 336 | 159   | 13   | 120 | 45 | Positive |

AME: alternariol monomethyl ether, AOH: alternariol, DON: deoxynivalenol, FB1: fumonisin B1, FB2: fumonisin B2, FB3: fumonisin B3, OTA: ochratoxin A, TEA: tenuazonic acid, ZON: zearalenone
